# Supplementary material for: Thermal and concentration effects on 1H NMR relaxation of Gd3+-aqua using MD simulations and measurements
Source: Royal Society of Chemistry journal article supplement (doi:10.1039/d2cp04390d), 2022-01-01
Supplement: d2cp04390d1.pdf [file d2cp04390d1.pdf]

Supplementary Information

## Thermal and concentration effects on $^1\text{H}$ NMR relaxation of $\text{Gd}^{3+}$ -aqua using MD simulations and measurements

Thiago J. Pinheiro dos Santos, Arjun Valiya Parambathu , Carla C. Fraenza, Casey Walsh, Steve G. Greenbaum, Walter G. Chapman, Dilip Asthagiri, and Philip M. Singer

### AMOEBA Forcefield parameters

Below we summarize the AMOEBA polarizable forcefield parameters for both the water<sup>23</sup> and the ions<sup>24</sup>.

#### - Atom name:

| Type | Class | Symbol | Description     | Atomic | Mass    | Valence |
|------|-------|--------|-----------------|--------|---------|---------|
| 1    | 1     | O      | Water Oxygen    | 8      | 15.999  | 2       |
| 2    | 2     | H      | Water Hydrogen  | 1      | 1.008   | 1       |
| 3    | 3     | Gd     | Gadolinium(III) | 64     | 157.250 | 0       |
| 4    | 4     | Cl     | Chloride        | 17     | 35.453  | 0       |

#### - VdW parameters:

| Class | Sigma (nm) | Epsilon (kJ/mol) | Reduction |
|-------|------------|------------------|-----------|
| 1     | 0.3405     | 0.46024          | 1.00      |
| 2     | 0.2655     | 0.056484         | 0.91      |
| 3     | 0.3650     | 41.8400          | 1.00      |
| 4     | 0.4130     | 1.42256          | 1.00      |

#### - Bond stretching parameters:

| Class 1 | Class 2 | K (kJ/mol) | d (nm)  |
|---------|---------|------------|---------|
| 1       | 2       | 232986.04  | 0.09572 |

#### - Angle bending parameters:

| Class 1 | Class 2 | Class 3 | K (kJ/mol) | Angle (deg) |
|---------|---------|---------|------------|-------------|
| 2       | 1       | 2       | 0.06206909 | 108.5       |

#### - Urey-Bradley force parameters:

| Class 1 | Class 2 | Class 3 | K (kJ/mol) | d (nm)  |
|---------|---------|---------|------------|---------|
| 2       | 1       | 2       | -3179.84   | 0.15326 |

**- Atomic dipole polarizability parameters:**

| Type | Alpha | Damp  | Group | Atom | Type |
|------|-------|-------|-------|------|------|
| 1    | 0.837 | 0.390 |       |      | 2    |
| 2    | 0.496 | 0.390 |       |      | 1    |
| 3    | 0.790 | 0.390 |       |      |      |
| 4    | 4.000 | 0.390 |       |      |      |

**- Atomic multipole parameters:**

| Type |    |    |          |          |          |  |
|------|----|----|----------|----------|----------|--|
| 1    | -2 | -2 | -0.51966 |          |          |  |
|      |    |    | 0.00000  | 0.00000  | 0.14279  |  |
|      |    |    | 0.37928  |          |          |  |
|      |    |    | 0.00000  | -0.41809 |          |  |
|      |    |    | 0.00000  | 0.00000  | 0.03881  |  |
| 2    | 1  | 2  | 0.25983  |          |          |  |
|      |    |    | -0.03859 | 0.00000  | -0.05818 |  |
|      |    |    | -0.03673 | -0.10739 |          |  |
|      |    |    | -0.00203 | 0.00000  | 0.14412  |  |
| 3    | 0  | 0  | 3.00000  |          |          |  |
|      |    |    | 0.00000  | 0.00000  | 0.00000  |  |
|      |    |    | 0.00000  |          |          |  |
|      |    |    | 0.00000  | 0.00000  |          |  |
|      |    |    | 0.00000  | 0.00000  | 0.00000  |  |
| 4    | 0  | 0  | -1.00000 |          |          |  |
|      |    |    | 0.00000  | 0.00000  | 0.00000  |  |
|      |    |    | 0.00000  |          |          |  |
|      |    |    | 0.00000  | 0.00000  |          |  |
|      |    |    | 0.00000  | 0.00000  | 0.00000  |  |

## Complementary simulation results

Table S1 Simulation box details obtained from NpT simulations and experimental data from NIST database<sup>43</sup> at different temperatures.

| T (°C) | MD simulations |               |                      |        |          |           | NIST <sup>43</sup> |                |
|--------|----------------|---------------|----------------------|--------|----------|-----------|--------------------|----------------|
|        | $N_W$          | $N_{Gd^{3+}}$ | V (nm <sup>3</sup> ) | L (Å)  | [W] (mM) | [Gd] (mM) | [W] (mM)           | $\eta$ (mPa.s) |
| 5      | 2006           | 1             | 60.228 ± 0.419       | 39.198 | 55307.49 | 27.57     | 55507              | 1.5182         |
| 10     | 2006           | 1             | 60.096 ± 0.411       | 39.170 | 55428.71 | 27.63     | 55492              | 1.3059         |
| 15     | 2006           | 1             | 59.992 ± 0.383       | 39.147 | 55524.98 | 27.68     | 55459              | 1.1376         |
| 25     | 2006           | 1             | 60.031 ± 0.410       | 39.155 | 55488.43 | 27.66     | 55345              | 0.8900         |
| 37     | 2006           | 1             | 60.189 ± 0.402       | 39.190 | 55343.34 | 27.59     | 55138              | 0.6913         |

Table S2 Simulation box details obtained from NpT simulations and experimental data from NIST database<sup>43</sup> at different concentrations of ions.

| T (°C) | MD simulations |               |            |                      |        |          |           | NIST <sup>43</sup> |
|--------|----------------|---------------|------------|----------------------|--------|----------|-----------|--------------------|
|        | $N_W$          | $N_{Gd^{3+}}$ | $N_{Cl^-}$ | V (nm <sup>3</sup> ) | L (Å)  | [W] (mM) | [Gd] (mM) | [W] (mM)           |
| 25     | 1003           | 1             | 3          | 30.046 ± 0.283       | 31.088 | 55432.01 | 55.27     | 55345              |
| 25     | 2006           | 1             | 0          | 60.031 ± 0.410       | 39.155 | 55488.43 | 27.66     | 55345              |
| 25     | 2006           | 1             | 3          | 60.047 ± 0.424       | 39.159 | 55473.54 | 27.65     | 55345              |
| 25     | 2006           | 2             | 6          | 60.063 ± 0.398       | 39.162 | 55459.04 | 55.29     | 55345              |

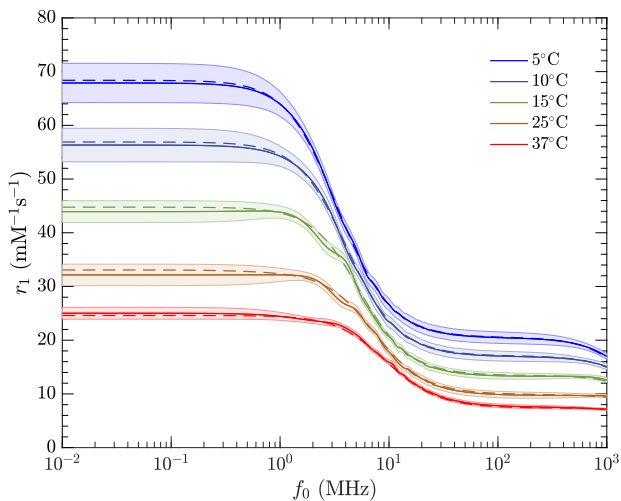

Fig. S1 Comparison of the longitudinal NMR relaxivity  $r_1$  of  $Gd^{3+}$ -aqua at different temperatures. The straight line (—) corresponds to the results obtained through the FFT approach (Equation (7)) and the shaded area represents its error bars, while the dashed line (---) results obtained through the Tikhonov regularization using the underlying distribution  $P(\tau)$  (Equation (16)).

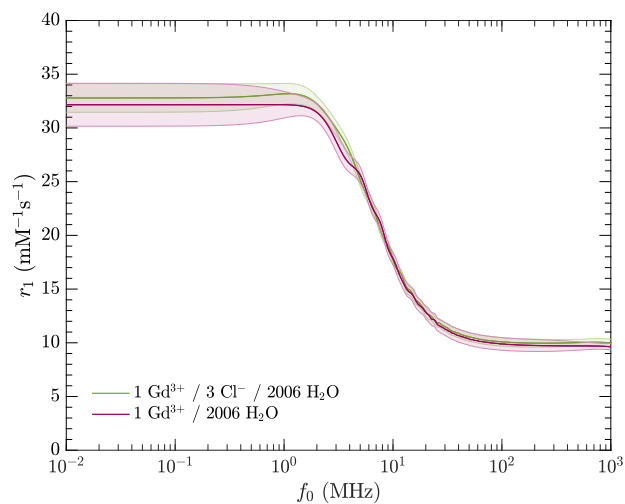

Fig. S2 Longitudinal NMR relaxivity  $r_1$  of  $\text{Gd}^{3+}$ -aqua obtained through the FFT approach (Equation (7)) with and without the  $\text{Cl}^-$  anions in the simulation box. As shown, the presence of the counter-ion at infinite dilution implies that  $\text{Gd}^{3+}$ - $\text{Cl}^-$  interactions are negligible and relaxivity is not affected.

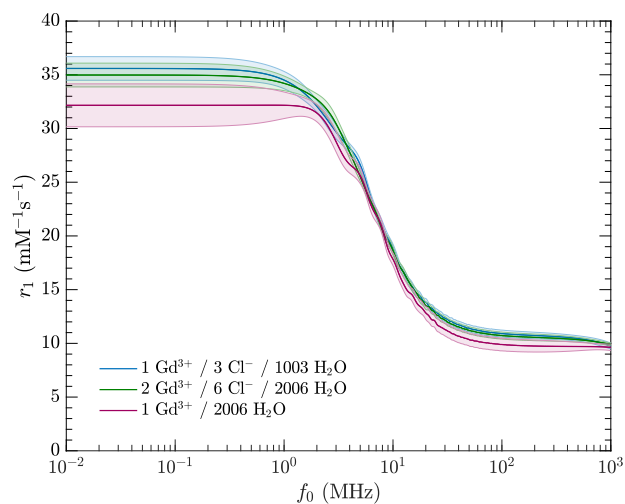

Fig. S3 Longitudinal NMR relaxivity  $r_1$  of  $\text{Gd}^{3+}$ -aqua obtained through the FFT approach (Equation (7)) at different nominal concentrations of  $\text{Gd}^{3+}$  in the simulation box. Provided that  $\text{Gd}^{3+}$ - $\text{Gd}^{3+}$  and  $\text{Gd}^{3+}$ - $\text{Cl}^-$  interactions are negligible, the infinite dilution limit is probed and NMR relaxivity associated with the paramagnetic ion is not affected.

### Measurements of self-diffusion

The measured self-diffusion coefficient of water at 25°C was found to be  $D_W \simeq 2.2 \cdot 10^{-9} \text{ m}^2 \cdot \text{s}^{-1}$  for both  $[\text{Gd}] = 0$  and 2 mM solutions, i.e., independent of  $\text{Gd}^{3+}$  concentration up to  $[\text{Gd}] = 2 \text{ mM}$ . These measurements are within 10 % of the MD simulations  $D_W \simeq 2.0 \cdot 10^{-9} \text{ m}^2 \cdot \text{s}^{-1}$  at 25°C (Figures 3(a) and 3(b)) where  $[\text{Gd}] = 28 \text{ mM}$  (Table S1), indicating that the concentration of gadolinium does not strongly affect  $D_W$ . Additional  $D_W$  measurements at  $[\text{Gd}] = 28 \text{ mM}$  were not possible due to the prohibitively short  $T_1$ .

NMR diffusion experiments were performed with a 400 MHz Bruker spectrometer operating at a magnetic field of 9.4 T, using a stimulated echo sequence. The gradient strength  $G$  took 16 different values following a linear increase and their values were in the range of 2-98% of a maximum strength  $50 \text{ G} \cdot \text{cm}^{-1}$ . The gradient pulse duration  $\delta$  and the diffusion time  $\Delta$  were 2 ms and 100 ms, respectively. The self-diffusion coefficients  $D_W$  were then extracted by fitting the echo signal decay with the Stejskal-Tanner equation<sup>42</sup>:

$$I = I_0 \exp \left[ -(\delta G \gamma)^2 \left( \Delta - \frac{\delta}{3} \right) D_W \right], \quad (27)$$

where  $I$  is the amplitude of the attenuated echo signal,  $I_0$  is the initial intensity, and  $\gamma$  is the gyro-magnetic ratio for  $^1\text{H}$ .

### Activation energy at constant frequency $f_0$

Table S3 Thermal activation energy  $E_f$  for the longitudinal NMR relaxivity  $r_1$  at different frequencies  $f_0$ .

| $f_0$ (MHz) | $E_f$ (kJ.mol <sup>-1</sup> ) |                         |                         |
|-------------|-------------------------------|-------------------------|-------------------------|
|             | MD simulations                | Reference <sup>51</sup> | Reference <sup>52</sup> |
| 10          | 11.4                          |                         | 10.4                    |
| 20          | 15.8                          | 10.05                   | 16.9                    |
| 50          | 20.6                          |                         | 21.0                    |
| 100         | 21.9                          |                         |                         |
| 200         | 22.3                          |                         |                         |
| 400         | 22.1                          |                         |                         |

In this section, we discuss the NMR relaxivity  $r_1$  of the  $\text{Gd}^{3+}$ –aqua complex in terms of the thermal activation energy  $E_f$  at different frequencies. This is relevant to elucidate that the molecular modes of relaxation discussed in Section 3.3 contribute to the total relaxation with different activation energies. Assuming an exponential law on the temperature dependency of the NMR relaxivity  $r_1$ , we have that

$$r_1(f_0) = r_1^\infty(f_0) \exp \left[ \frac{E_f(f_0)}{RT} \right]. \quad (28)$$

Table S3 presents the activation energies  $E_f$  of the NMR relaxivity  $r_1$  at different frequencies  $f_0$  across five simulated temperatures, as well as a comparison with experimental values<sup>51,52</sup>. As previously discussed, we did not calculate the activation energy at frequencies lower than 5 MHz since our simulations do not capture important electron-spin relaxation mechanisms.

The simulations results in Table S3 show that  $E_f$  increases with  $f_0$ , which is only possible if the different molecular modes have different activation energies.
